# Supplementary material for: Magnetic graphene-based cyanopropyltriethoxysilane as an adsorbent for simultaneous determination of polar and non-polar organophosphorus pesticides in cow’s milk
Source: Royal Society of Chemistry journal article supplement (doi:10.1039/c5ra26742k), 2016-01-01
Supplement: c5ra26742k1.pdf [file c5ra26742k1.pdf]

## Response to Q3

### ESI 1:

#### GC- $\mu$ ECD instrument calibration

Linearity for standard diazinon and chlorpyrifos was obtained in the concentration range 10 - 500 ng mL<sup>-1</sup> and for standard phosphamidon and dimethoate 200 - 10000 ng mL<sup>-1</sup> (Table S1 and Fig. S1). The instrument LOD obtained was 1.7, 2.8, 26.7 and 52.8 ng mL<sup>-1</sup> for chlorpyrifos, diazinon, phosphamidon and dimethoate, respectively. The instrument LOQ obtained was 5.6, 9.3, 88.9 and 175.9 ng mL<sup>-1</sup> for chlorpyrifos, diazinon, phosphamidon and dimethoate, respectively. Dynamic range for instrument was carried out by limit of linearity obtained in the range of 5.6 to 10,000 ng mL<sup>-1</sup> (for all the OPPs).

**Table S1 Data's for calibration curve**

| $C_s/C_{is}$ * | $A_s/A_{is}$ ** |            | $C_s/C_{is}$ | $A_s/A_{is}$ |              |
|----------------|-----------------|------------|--------------|--------------|--------------|
|                | Phosphamidon    | Dimethoate |              | Diazinon     | Chlorpyrifos |
| 2              | 0.027           | 0.018      | 0.01         | 0.005        | 0.019        |
| 10             | 0.126           | 0.072      | 0.1          | 0.018        | 0.031        |
| 20             | 0.288           | 0.119      | 1            | 0.074        | 0.154        |
| 50             | 0.727           | 0.279      | 3            | 0.198        | 0.422        |
| 100            | 1.372           | 0.533      | 5            | 0.324        | 0.691        |

$C_s$ : Concentration for standard OPPs,  $C_{is}$ : Concentration for internal standard,  $A_s$ : Peak area of standard OPPs and  $A_{is}$ : Peak area of internal standard.

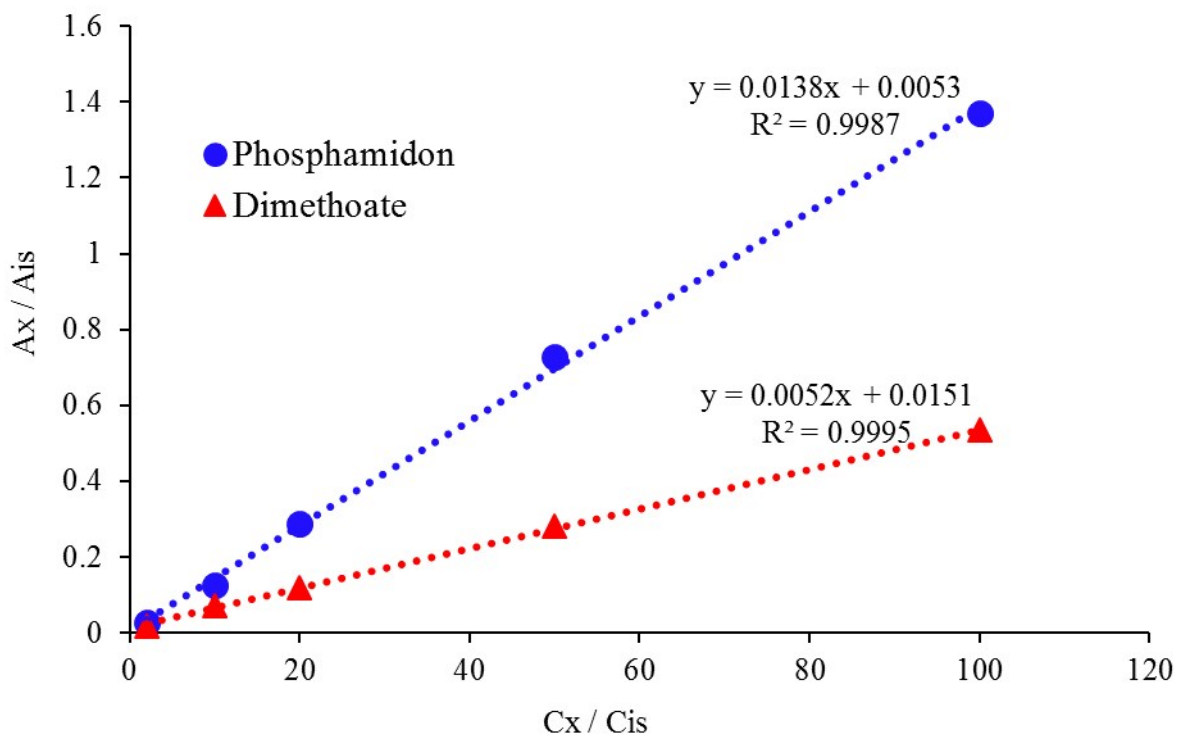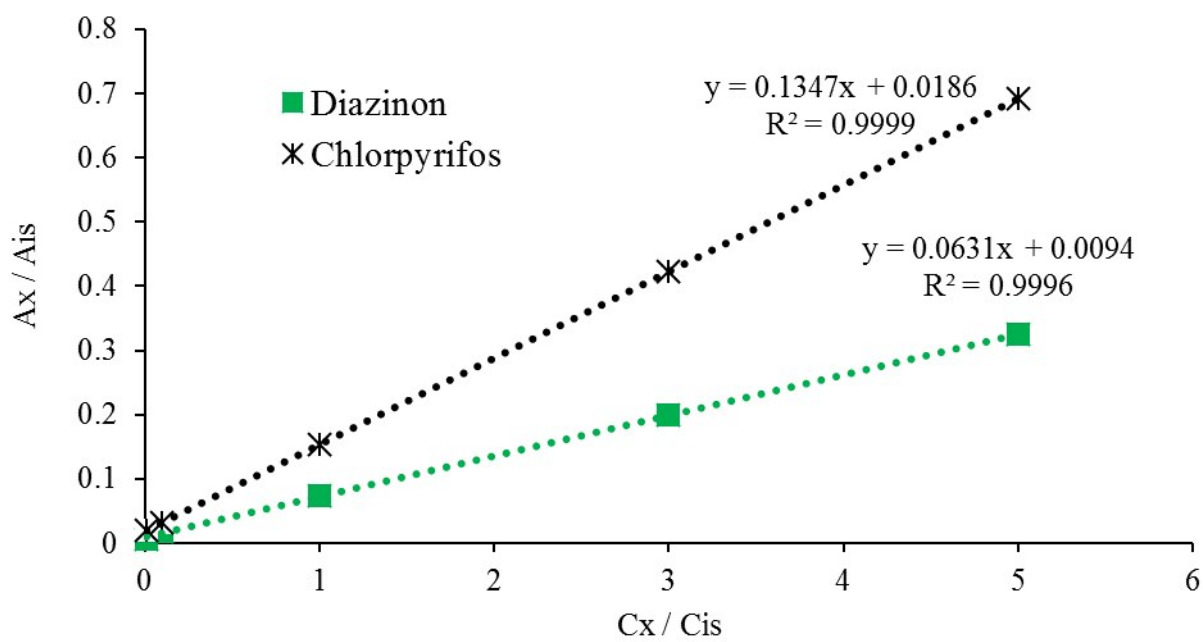

**Fig. S1** Calibration curve using internal standard method

## SEI 2:

### Effect of solvent volume on extraction performance

Different volume of acetonitrile ranging from 0.5 to 5 mL were studied for desorption of the four OPPs from, C18-SPE (Fig. S2A), CN-SPE (Fig. S2B) and Fe<sub>3</sub>O<sub>4</sub>@G-CNPrTEOS (Fig. S2C). Finally 1 mL, 3 mL and 2 mL acetonitrile were selected as the optimum volume for Fe<sub>3</sub>O<sub>4</sub>@G-CNPrTEOS, C18-SPE and CN-SPE, respectively.

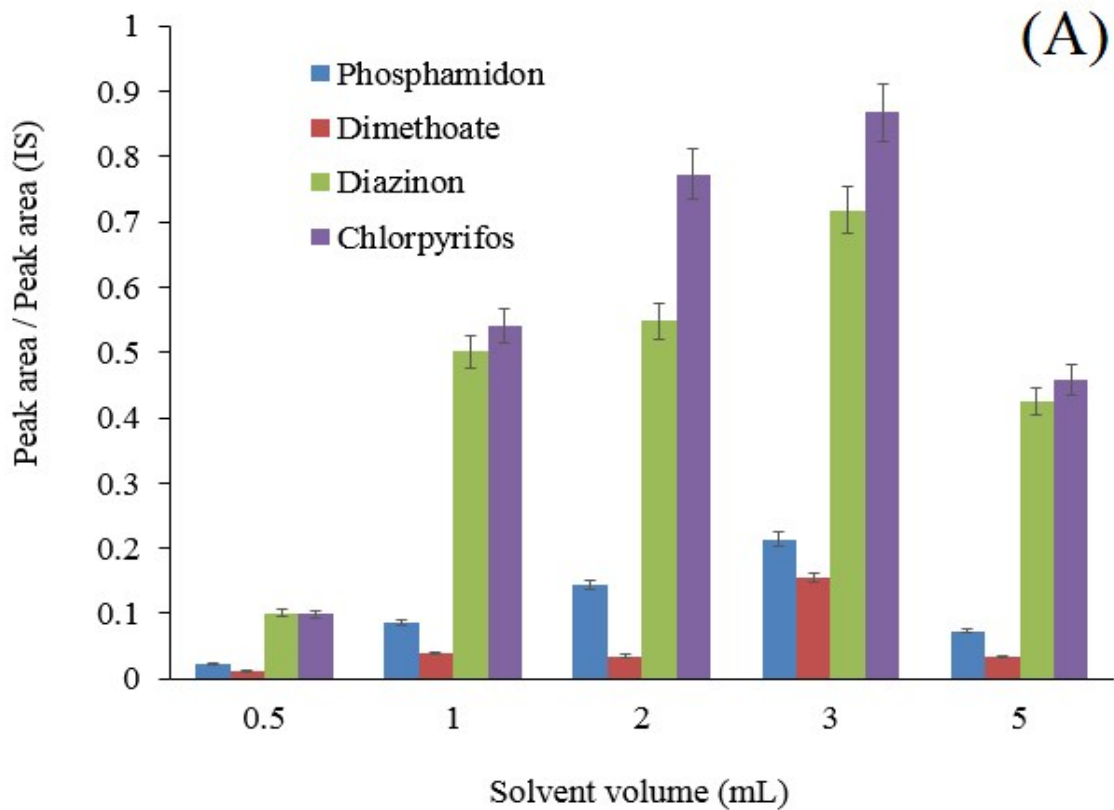

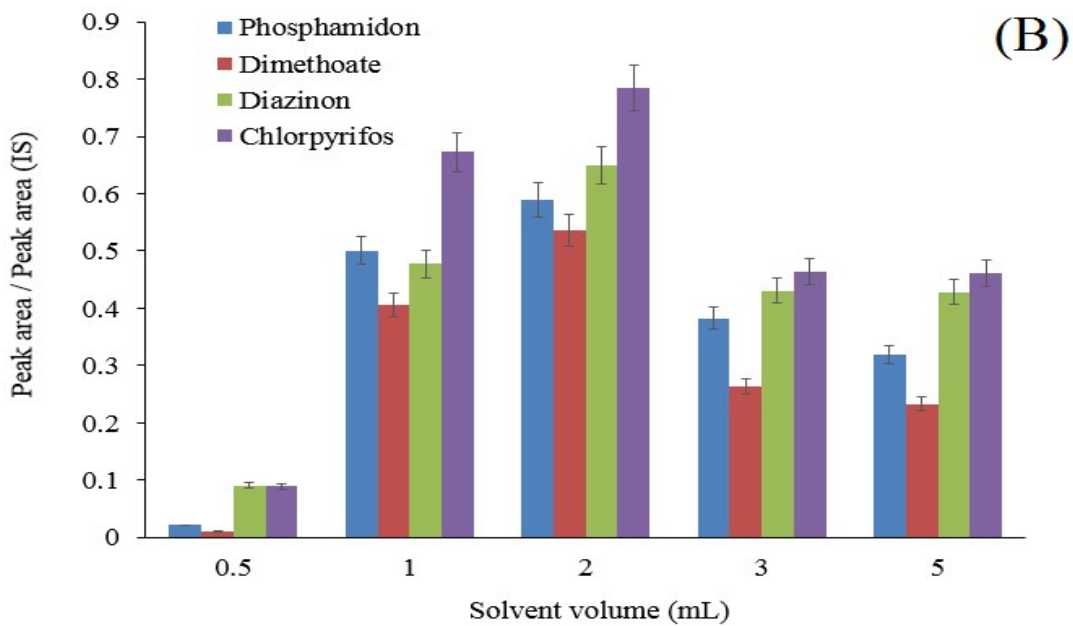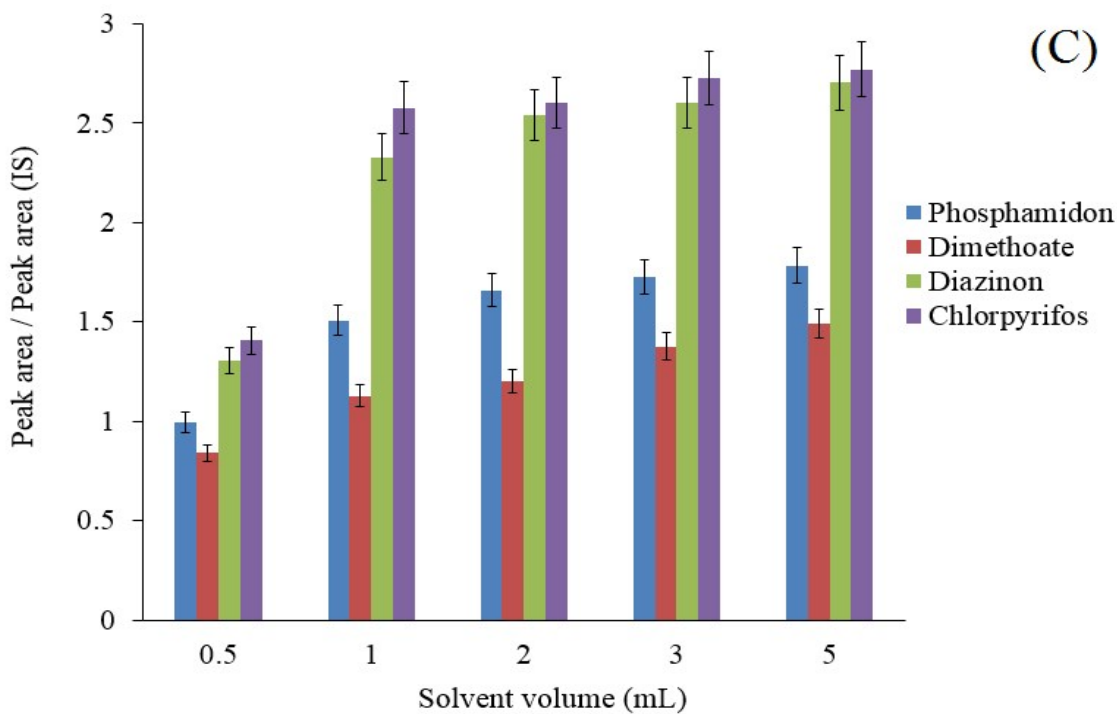

Fig. S2 Effect of solvent volume on extraction performance of (A) SPE-C18, (B) SPE-CN and (C)  $\text{Fe}_3\text{O}_4@\text{G-CNPrTEOS MSPE}$ .
